# Supplementary material
Source: publisher figshare collection journal article supplement (https://tandf.figshare.com/ndownloader/files/19009847)
Supplement: Supplementary file 1 [file 19009847]

## Sheet: Sheet1
	Appendix 1 Squirrel specimens and materials examined in the present study. BM = Body mass; hyphens mean no data. Storage numbers 1, 2 and 3 mean the Laboratory of Wildlife Biology, Obihiro University of Agriculture
	and Veterinary Medicine, the Botanic Garden, Hokkaido University, and the Obihiro Centennial Museum, respectively.
	(a) Sciurus vulgaris orientis									(b) Pteromys volans orii
	Identity	Collection						Collecting		Identity	Collection						Collecting
	numder	year	date	Sex	Age	BM (g)	Storage	locality		numder	year	date	Sex	Age	BM (g)	Storage	locality
	3	2010	Oct. 21	F	Sub-Ad	320	1	Obihiro		1118	1962	Jan. 17	–	Ad	81	1	–
	M0155	1970	Mar. 31	F	Sub-Ad	300	1	–		2011-1	2011	Oct. 11	M	Sub-Ad	34	1	Otofuke
	M-0641	1978	Mar. 1	M	Sub-Ad	288	1	Obihiro		M0540	1980	Aug. 3	M	Sub-Ad	74	1	Obihiro
	M-0642	1979	Dec. 2	M	Sub-Ad	321	1	Obihiro		OUW-M17	2005	Oct. 24	M	Sub-Ad	50	1	Obihiro
	OUW-M2	2002	Oct. 21	F	Ad	339	1	Otofuke		OUW-M19	2005	Aug. 16	F	Ad	112	1	Obihiro
	OUW-M14	2005	Sep. 28	M	Sub-Ad	316	1	Obihiro		Pv-1	2008	Apr. 20	F	Ad	117	1	Obihiro
	OUW-M15	2004	Mar. 9	M	Ad	368	1	–		Pv-2	1992	Apr. 21	F	Ad	110	1	Obihiro
	OUW-M104	2007	Jun. 18	F	Sub-Ad	323	1	Kushiro		Pv-3	2001	Sep. 23	M	Ad	105	1	Obihiro
	OUW-M106	2007	Aug. 30	M	Sub-Ad	280	1	Kitami		Pv-4	1991	Aug. 19	M	Ad	101	1	Obihiro
	Sv-1	1989	Jul. 4	F	Sub-Ad	272	1	Obihiro		Pv-5	1992	Apr. 28	M	Sub-Ad	79	1	Obihiro
	Sv-3	1992	Jan. 23	F	Sub-Ad	313	1	Obihiro		Pv-8	2017	Apr. 3	M	Ad	115	1	Obihiro
	Sv-6	1989	Apr. 3	M	Sub-Ad	302	1	Obihiro		Pv-9	2006	Apr. 6	F	Ad	107	1	–
	Sv-7	1992	Jun. 17	M	Ad	334	1	–		7888	–	Aug. 20	–	–	–	2	Ishikari
	Sv-12	1992	Jun. 24	M	Sub-Ad	162	1	Obihiro		7889	1915	Jan. 10	F	–	–	2	Sapporo
	Sv-13	1979	Dec. 1	M	–	–	1	Obihiro		7890	1908	Jun. 8	F	–	–	2	Sapporo
	Sv-14	1992	Jul. 21	M	Sub-Ad	299	1	Obihiro		7895	1914	Mar. 5	–	–	–	2	Tobetsu
	Sv-16	1980	Feb. 28	M	–	–	1	Obihiro		7898	–	Apr. 15	M	–	–	2	Sapporo
	7758	–	Apr. 12	–	–	–	2	–		7899	–	Oct. 11	M	–	–	2	Sapporo
	7942	–	Oct. 17	M	–	–	2	–		7912	1909	Feb. 11	M	–	–	2	Sapporo
	7960	1915	Feb. 22	M	–	–	2	Tomakomai		7913	–	Oct. 11	–	–	–	2	Sapporo
	7961	1914	Mar. 6	M	–	–	2	Sapporo		7914	1912	Jun. 10	–	–	–	2	Sapporo
	7964	–	Feb. 21	F	–	–	2	Sapporo		7915	1915	Jan. 12	F	–	–	2	Sapporo
	7965	–	Feb. 26	M	–	–	2	Sapporo		7916	–	Jul. 3	–	–	–	2	Sapporo
	7979	–	Feb. 21	M	–	–	2	Sapporo		7917	1910	Mar. 10	F	–	–	2	Sapporo
	7980	1906	Apr. 11	F	–	–	2	Sapporo		7957	–	Mar. 12	–	–	–	2	Chitose
	7981	–	Jul. 14	–	–	–	2	Hokuto		9331	1915	Sep. 10	F	–	–	2	Sapporo
	7984	1915	Feb. 24	M	–	–	2	Abira		45373	1994	Apr. 28	M	–	–	2	Noboribetsu
	7985	–	Dec. 9	–	–	–	2	Sapporo		47567	1933	Jul. 15	–	–	–	2	–
	7986	–	Sep. 4	F	–	–	2	Sapporo		50845	1965	Jan. 27	M	–	–	2	Sapporo
	7988	–	Feb. 21	M	–	–	2	Sapporo		53940	1967	Mar. 1	F	–	–	2	Tobetsu
	7989	1914	Feb. 24	–	–	–	2	Sapporo		55604	1988	Oct. 17	F	–	–	2	Sapporo
	7992	1914	Mar. 6	M	–	–	2	Sapporo		56145	1997	Jul. 22	F	–	–	2	Tobetsu
	7996	–	Apr. 12	–	–	–	2	–
	9427	–	Mar. 31	–	–	–	2	Sapporo
	9435	–	Apr. 19	–	–	–	2	–
	9440	–	Mar. 3	–	–	–	2	Sapporo
	9441	–	Mar. 3	–	–	–	2	Sapporo
	9442	–	Mar. 3	–	–	–	2	Sapporo
	9443	–	Mar. 31	–	–	–	2	Sapporo
	23508	1967	Jul. 26	F	Ad	328	2	Sapporo
	23511	1967	Jul. 26	M	–	–	2	Sapporo
	24878	–	Apr. 7	–	–	–	2	Sapporo
	33896	1999	Jul. 3	M	Sub-Ad	300	2	Sapporo
	42993	1985	Sep. 18	–	–	–	2	–
	46341	2002	Jul. 25	F	Ad	360	2	Sapporo
	47245	1937	Dec. 7	–	–	–	2	Minamifurano
	47252	1937	Sep. 14	–	–	–	2	Obira
	47253	1937	Sep. 20	–	–	–	2	Obira
	47549	1988	Apr. 7	M	–	–	2	–
	47553	1933	Aug. 18	F	–	–	2	Higashikawa
	47555	1936	Feb. 21	M	–	–	2	Sapporo
	48590	2006	Jul. 31	M	Sub-Ad	280	2	Sapporo
	49966	1958	Dec. 27	F	Ad	380	2	Sapporo
	50810	1964	Dec. 31	F	Sub-Ad	275	2	Sapporo
	50830	1965	Jan. 13	F	Ad	338	2	Sapporo
	50833	1965	Jan. 15	M	Sub-Ad	282	2	Sapporo
	50863	1965	Feb. 22	M	–	–	2	Uryu
	51623	1965	Oct. 3	F	Ad	334	2	Kuriyama
	55182	1982	Jan. 11	M	Ad	325	2	Atsuma
	55183	1982	Jan. 11	M	Ad	340	2	Atsuma
	56094	1983	Jul. 14	F	–	–	2	Sapporo
	60297	2008	Oct. 5	M	–	–	2	Ebetsu
	60298	2008	Aug. 14	F	Ad	424	2	Tsurui
	61413	2009	Sep. 21	F	Sub-Ad	280	2	Niseko
	65952	2014	Oct. 1	M	Sub-Ad	128	2	Sapporo
	65953	2014	Oct. 24	M	Sub-Ad	226	2	Sapporo
	M7	1991	Mar. 21	M	Ad	340	3	Obihiro
	M11	2002	Dec. 9	–	Ad	340	3	Obihiro
	M15	2003	Dec. 5	F	Sub-Ad	285	3	Obihiro
	M18	2003	Jun. 30	F	Ad	410	3	Obihiro
	M19	2004	Feb. 5	M	Sub-Ad	320	3	Memuro
	M21	2005	Dec. 15	–	–	–	3	–
	M24	2006	Sep. 27	M	Ad	330	3	Obihiro
	M25	–	Oct. 22	–	Sub-Ad	312	3	Obihiro
	M26	2007	Jun. 23	F	Sub-Ad	270	3	Obihiro
	M28	2007	Aug. 22	F	Sub-Ad	285	3	Obihiro
	M30	2009	Feb. 10	M	Sub-Ad	300	3	Obihiro
	M31	2009	Sep. 4	F	Sub-Ad	285	3	Obihiro
	M32	2010	Jul. 27	–	Sub-Ad	302	3	Obihiro
	M33	2010	Sep. 18	M	Ad	336	3	Obihiro
	M34	2010	Oct. 9	–	Sub-Ad	292	3	Obihiro
	M35	2011	Apr. 6	F	Ad	370	3	Obihiro
	M39	2013	Aug. 24	F	Sub-Ad	280	3	Obihiro
	OC-3	2014	Sep. 20	M	–	–	3	Obihiro
	OC-6	2002	Oct. 1	M	Sub-Ad	293	3	Obihiro
